# Supplementary material
Source: publisher figshare collection journal article supplement (https://wiley.figshare.com/articles/dataset/_/3523136)
Supplement: Supplementary file 1 [file 1 › appendix-A.htm]

Ecological Archives E085-003-A1


### *Ecological Archives* E085-003-A1

### **Otso Ovaskainen. 2004. Habitat-specific movement parameters estimated using mark–recapture data and a diffusion model. *Ecology* 85:242–257.**

Appendix A. Numerical solutions
by the finite element method. A
pdf file of this appendix is also available.

The finite element method (FEM)
is a standard tool for finding numerical solutions to partial differential
equations (Zienkiewicz and Taylor 2000). As implied by
its name, the method is based on dividing a domain 
to a number of smaller subdomains, which are called elements. The shape of
the most suitable elements depends on the geometry of the problem considered,
but a majority of applications uses triangles in two dimensions and tetrahedrons
in three dimensions. The basic assumption of the method is that the exact
solution v may be approximated by a function v\*, which is assumed
to be a linear combination of fixed shape functions, which are typically low-order
polynomials within each element. In order to utilize the finite element method,
the problem has to be transformed into a variational form. To do this, I first
multiply both sides of Eq. 1 by an arbitrary continuous function u, and integrate
over the domain .

|  |  |
| --- | --- |
|  | (A.1) |

Integrating by parts gives

|  |  |
| --- | --- |
|  |  |
|  | (A.2) |
|  |  |

As the flux Di(t) vn(**x**,t)
is assumed to be continuous through the interior boundaries and zero at ,
the boundary term in Eq. A.2 vanishes, and we obtain

|  |  |
| --- | --- |
|  | (A.3) |

Equation A.3 defines the weak or the variational formulation
of the original problem. It is neither necessary nor possible to go deep in
the mathematical detail here, but the essential point is that a function v that
is sufficiently smooth and that satisfies the weak formulation for all u belonging
to a suitable function space is also the solution to the original problem .

In order to discretize the problem,
I let Ñj (j=1,..., m) denote a set of shape functions which are
continuous in .
In order to take into account for the discontinuities through the interior
boundaries i,
I let Nj denote the shape functions defined by Nj(**x**)=k(**x**)
Ñj(**x**), where k(**x**)=ki for **x** i.
Furthermore, I denote the finite element approximation for v at time t by
v\*(**x**,t;**y**)=j
aj(t) Nj(**x**), where **a**(t)={aj(t)}
is the coefficient vector. Then, assuming that v\* satisfies the
weak formulation (Eq. A.3) for all u=Ñk, it
follows that **a** satisfies

|  |  |
| --- | --- |
|  | (A.4) |

where Ai and Bi
denote the matrices with elements

|  |  |
| --- | --- |
|  | (A.5) |
|  |  |
|  | (A.6) |

and A(t) and K(t) denote the appropriate
sums of the matrices. In order to discretize Eq. A.4 in
time, I let t
denote the time step and write t=T t
where T=0,1,..., so that aT=a(T t).
Assuming that the matrices A(t) and K(t) are constants within each time step,
simple single-step algorithms lead to the relation (Zienkiewicz
and Taylor 2000)

|  |  |
| --- | --- |
|  | (A.7) |

In Eq. A.7, 0 
  1 is a weighting
parameter, which I have set to 
= 2/3 corresponding to the Galerkin scheme. Equation A.7
represents a system of linear equations, from which **a**T+1 may
be solved given that **a**T is known.  
  

**Literature cited**

Zienkiewicz,
O. C., and R. L. Taylor. 2000. The finite element method: Volume 1: the basis.
Butterworth-Heinemann, Oxford, Massachusetts, USA.

---

  
[Back to E085-003]
